# Supplementary material for: The effect of Fc region affinity of protein-based antibody-recruiting molecules on antibody-dependent cellular cytotoxicity
Source: Royal Society of Chemistry journal article supplement (doi:10.1039/d4ra03391d), 2024-01-01
Supplement: d4ra03391d1.pdf [file d4ra03391d1.pdf]

## The effect of Fc region affinity of protein-based antibody-recruiting molecules on antibody-dependent cellular cytotoxicity

Hiroshi Tagawa,<sup>‡a</sup> Riku Saeki,<sup>‡a</sup> Chihaya Yamamoto,<sup>‡a</sup> Kenta Tanito,<sup>a</sup> Chihiro Tanaka,<sup>b</sup> Shoki Munekawa,<sup>a</sup> Teruki Nii,<sup>a,c</sup> Akihiro Kishimura,<sup>a,c,d,e</sup> Hiroshi Murakami,<sup>b,f</sup> Takeshi Mori,<sup>a,c,d\*</sup> Yoshiki Katayama<sup>a,c,d,e</sup>

\* Corresponding Author

<sup>a</sup> Graduate School of Systems Life Sciences, Kyushu University, 744 Motoooka, Nishi-ku, Fukuoka 819-0395, Japan

<sup>b</sup> Department of Biomolecular Engineering, Graduate School of Engineering, Nagoya University, Furo-cho, Chikusa-ku, Nagoya 464-8603, Japan

<sup>c</sup> Department of Applied Chemistry, Faculty of Engineering, Kyushu University, 744 Motoooka, Nishi-ku, Fukuoka 819-0395, Japan

<sup>d</sup> Center for Future Chemistry, Kyushu University, 744 Motoooka, Nishi-ku, Fukuoka 819-0395, Japan

<sup>e</sup> International Research Center for Molecular Systems, Kyushu University, 744 Motoooka, Nishi-ku, Fukuoka 819-0395, Japan

<sup>f</sup> Institute of Nano-Life-Systems, Institutes of Innovation for Future Society, Nagoya University, Furo-cho, Chikusa-ku, Nagoya 464-8603, Japan

## Supporting Information

### A-Z (381 bp, 127 aa)

```
10      20      30      40      50      60      70      80      90     100
1 ATGTTGATAATAAATTCACAAAGAGATGCGCAACGCGTATTGGGAGATTGCTTTGCTTCCAAACCTTAACAACCAGCAGAAACGGGCCTTTATCCGTT 100
  M V D N K F N K E M R N A Y W E I A L L P N L N N Q Q K R A F I R S
      110     120     130     140     150     160     170     180     190     200
101 CCCTGTACGATGACCCCTCACAGAGCGCCAACCTTATTGGCAGAGGCGAAGAACTGAACGACGCTCAAGCACCTAAATCGTCTTCTCCGGAATCGATAA 200
  L Y D D P S Q S A N L L A E A K K L N D A Q A P K S S S S G V D N
      210     220     230     240     250     260     270     280     290     300
201 TAAGTTTAAACAAGGAACAACAAAACGCCTTCTATGAGATCCTTCACCTGCCGAACCTTAATGAAGAACAACGGAACGCTTTCATACAATCTCTGAAGGAC 300
  K F N K E Q Q N A F Y E I L H L P N L N E E Q R N A F I Q S L K D
      310     320     330     340     350     360     370     380
301 GACCCATCGCAGAGTGCAAACCTTACTTGGGAGGCTAAAAAATTAATGATGCTCAAGCTCCGAAGCATCATCATCACCATCAC 384
  D P S Q S A N L L A E A K K L N D A Q A P K H H H H H H H
```

### A-ZZ (585 bp, 195 aa)

```
10      20      30      40      50      60      70      80      90     100
1 ATGTTGATAATAAATTCACAAAGAGATGCGCAACGCGTATTGGGAGATTGCTTTGCTTCCAAACCTTAACAACCAGCAGAAACGGGCCTTTATCCGTT 100
  M V D N K F N K E M R N A Y W E I A L L P N L N N Q Q K R A F I R S
      110     120     130     140     150     160     170     180     190     200
101 CCCTGTACGATGACCCCTCACAGAGCGCCAACCTTATTGGCAGAGGCGAAGAACTGAACGACGCTCAAGCACCTAAATCGTCTTCTCCGGAAGTAGCAG 200
  L Y D D P S Q S A N L L A E A K K L N D A Q A P K S S S S G S S S
      210     220     230     240     250     260     270     280     290     300
201 TTCGGGGTCTCCTCAAGCGGCATCGATAATAAGTTTAAACAAGGAACAACAAAACGCCTTCTATGAGATCCTTCACCTGCCGAACCTTAATGAAGAACA 300
  S G S S S G V D N K F N K E Q Q N A F Y E I L H L P N L N E E Q
      310     320     330     340     350     360     370     380     390     400
301 CGGAACGCTTTCATACAATCTCTGAAGGACGACCCATCGCAGAGTGCAAACCTTACTTGGGAGGCTAAAAAATTAATGATGCTCAAGCTCCGAAGGTCCG 400
  R N A F I Q S L K D D P S Q S A N L L A E A K K L N D A Q A P K V D
      410     420     430     440     450     460     470     480     490     500
401 ATAATAAGTTTAAACAAGGAACAACAAAACGCCTTCTATGAGATCCTTCACCTGCCGAACCTTAATGAAGAACAACGGAACGCTTTCATACAATCTCTGAA 500
  N K F N K E Q Q N A F Y E I L H L P N L N E E Q R N A F I Q S L K
      510     520     530     540     550     560     570     580
501 GGACGACCCATCGCAGAGTGCAAACCTTACTTGGGAGGCTAAAAAATTAATGATGCTCAAGCTCCGAAGCATCATCATCACCATCAC 588
  D D P S Q S A N L L A E A K K L N D A Q A P K H H H H H H H
```

**Fig. S1** Codon sequences and amino acid sequences of Fc-ARMs.

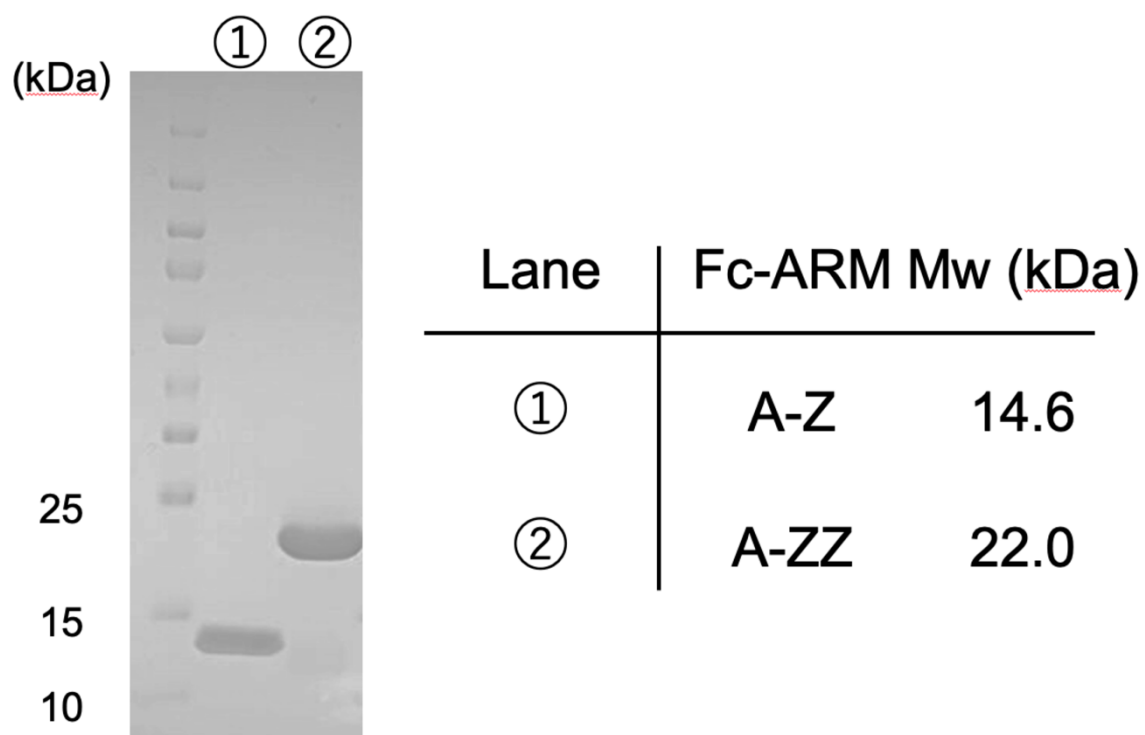

**Fig. S2** SDS-PAGE of each Fc-ARM after purification and their calculated molecular weights: 1: A-Z, and 2:A-ZZ.

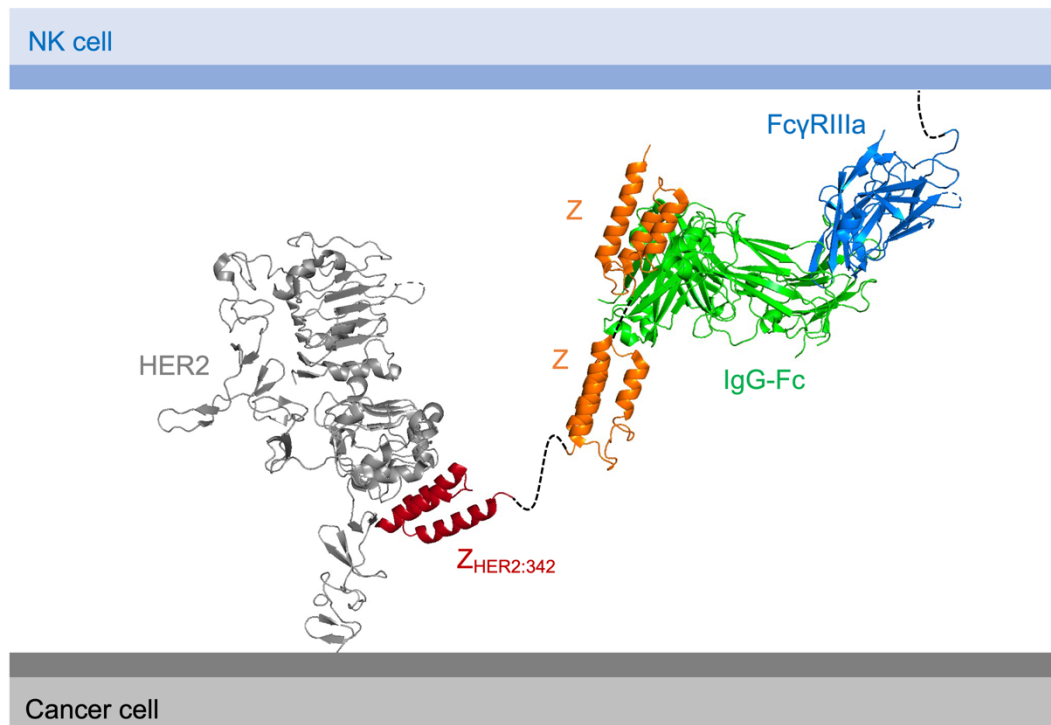

**Fig. S3** A complex model of HER2/Fc-ARM/IgG/FcγRIIIa generated based on the crystal structures of HER2/Z<sub>HER2 342</sub> (PDB ID: 3MZW), Z/Fc (PDB ID: 1FCC), and Fc/FcγRIIIa (PDB ID: 5VU0).

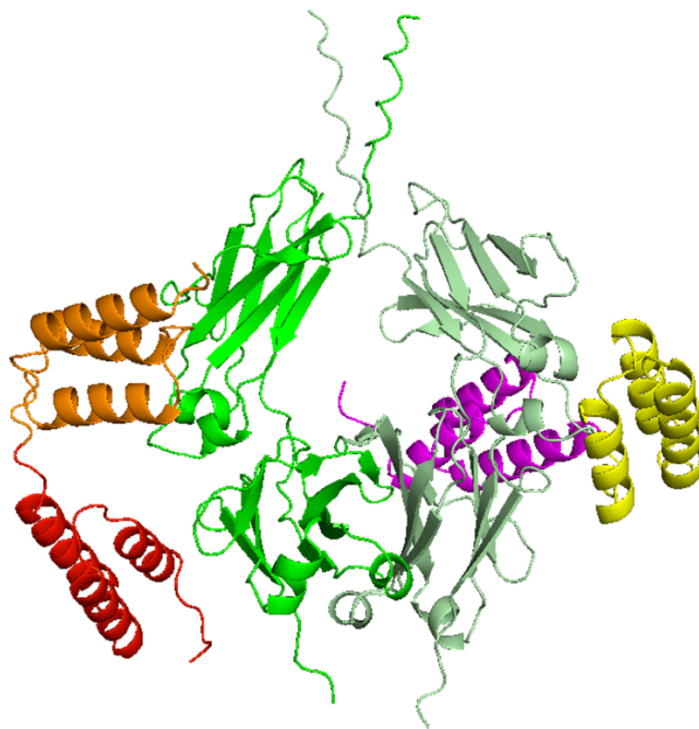

**Fig. S4** The complex between ZZ (red and orange, or magenta and yellow) and IgG Fc (light green and pale green) predicted by Alphafold2 and generated by PyMOL.
